# Supplementary material
Source: HighWire-hosted journal article supplement (https://bjo.bmj.com/content/bjophthalmol-2019-313907)
Supplement: inline-supplementary-material-2 [file inline-supplementary-material-2.pdf]

## Adverse events of Special Interest as per Periodic Safety Update Report and Risk Management Plan

| MedDRA (v 18.1) terms                                     | Safety risks (RMP)                                                                                                 |
|-----------------------------------------------------------|--------------------------------------------------------------------------------------------------------------------|
| Candida endophthalmitis                                   | Infectious endophthalmitis                                                                                         |
| Endophthalmitis                                           | Infectious endophthalmitis                                                                                         |
| Eye infection                                             | Infectious endophthalmitis                                                                                         |
| Eye infection fungal                                      | Infectious endophthalmitis                                                                                         |
| Eye infection intraocular                                 | Infectious endophthalmitis                                                                                         |
| Eye infection chlamydial                                  | Infectious endophthalmitis                                                                                         |
| Eye infection bacterial                                   | Infectious endophthalmitis                                                                                         |
| Hypopyon                                                  | Infectious endophthalmitis                                                                                         |
| Eye infection staphylococcal                              | Infectious endophthalmitis                                                                                         |
| Infective uveitis                                         | Infectious endophthalmitis                                                                                         |
| Mycotic endophthalmitis                                   | Infectious endophthalmitis                                                                                         |
| Panophthalmitis                                           | Infectious endophthalmitis                                                                                         |
| Suspected transmission of an infectious agent via product | Infectious endophthalmitis                                                                                         |
| Viral uveitis                                             | Infectious endophthalmitis                                                                                         |
| Vitreous abscess                                          | Infectious endophthalmitis                                                                                         |
| Macular detachment                                        | Retinal detachment and retinal tear<br>(search was performed with and without the LLT serous detachment of macula) |
| Retinal tear                                              | Retinal detachment and retinal tear<br>(search was performed with and without the LLT serous detachment of macula) |
| Retinal detachment                                        | Retinal detachment and retinal tear<br>(search was performed with and without the LLT serous detachment of macula) |
| Retinopexy                                                | Retinal detachment and retinal tear<br>(search was performed with and without the LLT serous detachment of macula) |
| Scleral buckling surgery                                  | Retinal detachment and retinal tear<br>(search was performed with and without the LLT serous detachment of macula) |
| Cataract traumatic                                        | Traumatic cataract                                                                                                 |
| Injection site injury                                     | Traumatic cataract                                                                                                 |
| Posterior capsule rupture                                 | Traumatic cataract                                                                                                 |
| Lenticular injury                                         | Traumatic cataract                                                                                                 |
| Acute zonal occult outer retinopathy                      | Intraocular inflammation                                                                                           |
| Anterior chamber cell                                     | Intraocular inflammation                                                                                           |
| Anterior chamber flare                                    | Intraocular inflammation                                                                                           |
| Anterior chamber fibrin                                   | Intraocular inflammation                                                                                           |

---

|                                                   |                               |
|---------------------------------------------------|-------------------------------|
| Anterior chamber inflammation                     | Intraocular inflammation      |
| Aqueous fibrin                                    | Intraocular inflammation      |
| Autoimmune uveitis                                | Intraocular inflammation      |
| Birdshot chorioretinopathy                        | Intraocular inflammation      |
| Cholesterolosis bulbi                             | Intraocular inflammation      |
| Chorioretinitis                                   | Intraocular inflammation      |
| Chorioretinopathy                                 | Intraocular inflammation      |
| Choroiditis                                       | Intraocular inflammation      |
| Ciliary hyperemia                                 | Intraocular inflammation      |
| Cogan's syndrome                                  | Intraocular inflammation      |
| Cyclitic membrane                                 | Intraocular inflammation      |
| Cyclitis                                          | Intraocular inflammation      |
| Eye inflammation                                  | Intraocular inflammation      |
| Idiopathic orbital inflammation                   | Intraocular inflammation      |
| Iridocyclitis                                     | Intraocular inflammation      |
| Iritis                                            | Intraocular inflammation      |
| Macular edema                                     | Intraocular inflammation      |
| Neuromyelitis optica                              | Intraocular inflammation      |
| Non-infectious endophthalmitis                    | Intraocular inflammation      |
| Noninfective chorioretinitis                      | Intraocular inflammation      |
| Noninfective retinitis                            | Intraocular inflammation      |
| Ocular vasculitis                                 | Intraocular inflammation      |
| Ocular pemphigoid                                 | Intraocular inflammation      |
| Ocular hyperemia                                  | Intraocular inflammation      |
| Ocular sarcoidosis                                | Intraocular inflammation      |
| Oculomucocutaneous syndrome                       | Intraocular inflammation      |
| Oculorespiratory syndrome                         | Intraocular inflammation      |
| Ophthalmia neonatorum                             | Intraocular inflammation      |
| Optic neuritis                                    | Intraocular inflammation      |
| Periorbital edema                                 | Intraocular inflammation      |
| Pseudoendophthalmitis                             | Intraocular inflammation      |
| Retinal edema Retinal vasculitis                  | Intraocular inflammation      |
| Retinitis                                         | Intraocular inflammation      |
| Toxic anterior segment syndrome                   | Intraocular inflammation      |
| Tubulointerstitial nephritis and uveitis syndrome | Intraocular inflammation      |
| Uveitis                                           | Intraocular inflammation      |
| Uveitis-glaucoma-hyphema syndrome                 | Intraocular inflammation      |
| Vitritis                                          | Intraocular inflammation      |
| Vogt-Koyanagi-Harada syndrome                     | Intraocular inflammation      |
| Intraocular pressure increased                    | Intraocular pressure increase |
| Intraocular pressure fluctuation                  | Intraocular pressure increase |
| Intraocular pressure test abnormal                | Intraocular pressure increase |
| Ocular hypertension                               | Intraocular pressure increase |

---

|                                       |                       |
|---------------------------------------|-----------------------|
| Abdominal wall hematoma               | Non-ocular hemorrhage |
| Abnormal withdrawal bleeding          | Non-ocular hemorrhage |
| Abdominal wall hemorrhage             | Non-ocular hemorrhage |
| Adrenal hematoma                      | Non-ocular hemorrhage |
| Acute hemorrhagic ulcerative colitis  | Non-ocular hemorrhage |
| Acute hemorrhagic leukoencephalitis   | Non-ocular hemorrhage |
| Adrenal hemorrhage                    | Non-ocular hemorrhage |
| Anal hemorrhage                       | Non-ocular hemorrhage |
| Anal ulcer hemorrhage                 | Non-ocular hemorrhage |
| Anastomotic hemorrhage                | Non-ocular hemorrhage |
| Anastomotic ulcer hemorrhage          | Non-ocular hemorrhage |
| Aneurysm ruptured                     | Non-ocular hemorrhage |
| Anorectal varices hemorrhage          | Non-ocular hemorrhage |
| Aortic aneurysm rupture               | Non-ocular hemorrhage |
| Aortic dissection rupture             | Non-ocular hemorrhage |
| Aortic intramural hematoma            | Non-ocular hemorrhage |
| Aortic perforation                    | Non-ocular hemorrhage |
| Aortic rupture                        | Non-ocular hemorrhage |
| Aponeurosis contusion                 | Non-ocular hemorrhage |
| Application site bruise               | Non-ocular hemorrhage |
| Application site hematoma             | Non-ocular hemorrhage |
| Application site hemorrhage           | Non-ocular hemorrhage |
| Arterial hemorrhage                   | Non-ocular hemorrhage |
| Arterial intramural hematoma          | Non-ocular hemorrhage |
| Arterial perforation                  | Non-ocular hemorrhage |
| Arterial rupture                      | Non-ocular hemorrhage |
| Arteriovenous fistula site hematoma   | Non-ocular hemorrhage |
| Arteriovenous fistula site hemorrhage | Non-ocular hemorrhage |
| Arteriovenous graft site hematoma     | Non-ocular hemorrhage |
| Arteriovenous graft site hemorrhage   | Non-ocular hemorrhage |
| Astringent therapy                    | Non-ocular hemorrhage |
| Atrial rupture                        | Non-ocular hemorrhage |
| Auricular hematoma                    | Non-ocular hemorrhage |
| Basilar artery perforation            | Non-ocular hemorrhage |
| Basal ganglia hemorrhage              | Non-ocular hemorrhage |
| Basal ganglia hematoma                | Non-ocular hemorrhage |
| Bladder tamponade                     | Non-ocular hemorrhage |
| Bleeding varicose vein                | Non-ocular hemorrhage |
| Blood blister                         | Non-ocular hemorrhage |
| Blood urine                           | Non-ocular hemorrhage |
| Blood urine present                   | Non-ocular hemorrhage |
| Bloody discharge                      | Non-ocular hemorrhage |
| Bloody peritoneal effluent            | Non-ocular hemorrhage |
| Bone contusion                        | Non-ocular hemorrhage |

---

|                                                 |                       |
|-------------------------------------------------|-----------------------|
| Bone marrow hemorrhage                          | Non-ocular hemorrhage |
| Brain stem hematoma                             | Non-ocular hemorrhage |
| Brain stem hemorrhage                           | Non-ocular hemorrhage |
| Breast hematoma                                 | Non-ocular hemorrhage |
| Breast hemorrhage                               | Non-ocular hemorrhage |
| Broad ligament hematoma                         | Non-ocular hemorrhage |
| Bronchial hemorrhage                            | Non-ocular hemorrhage |
| Cardiac contusion                               | Non-ocular hemorrhage |
| Carotid artery perforation                      | Non-ocular hemorrhage |
| Catheter site bruise                            | Non-ocular hemorrhage |
| Carotid aneurysm rupture                        | Non-ocular hemorrhage |
| Catheter site hematoma                          | Non-ocular hemorrhage |
| Catheter site hemorrhage                        | Non-ocular hemorrhage |
| Central nervous system hemorrhage               | Non-ocular hemorrhage |
| Cephalhematoma                                  | Non-ocular hemorrhage |
| Cerebellar hematoma                             | Non-ocular hemorrhage |
| Cerebellar hemorrhage                           | Non-ocular hemorrhage |
| Cerebral aneurysm ruptured syphilitic           | Non-ocular hemorrhage |
| Cerebral arteriovenous malformation hemorrhagic | Non-ocular hemorrhage |
| Cerebral artery perforation                     | Non-ocular hemorrhage |
| Cerebral hematoma                               | Non-ocular hemorrhage |
| Cerebral hemorrhage                             | Non-ocular hemorrhage |
| Cerebral hemorrhage fetal                       | Non-ocular hemorrhage |
| Cerebral hemorrhage neonatal                    | Non-ocular hemorrhage |
| Cervix hematoma uterine                         | Non-ocular hemorrhage |
| Cervix hemorrhage uterine                       | Non-ocular hemorrhage |
| Cerebral microhemorrhage                        | Non-ocular hemorrhage |
| Chronic gastrointestinal bleeding               | Non-ocular hemorrhage |
| Chronic pigmented purpura                       | Non-ocular hemorrhage |
| Coital bleeding                                 | Non-ocular hemorrhage |
| Colonic hematoma                                | Non-ocular hemorrhage |
| Contusion                                       | Non-ocular hemorrhage |
| Cullen's sign                                   | Non-ocular hemorrhage |
| Cystitis hemorrhagic                            | Non-ocular hemorrhage |
| Deep dissecting hematoma                        | Non-ocular hemorrhage |
| Diarrhea hemorrhagic                            | Non-ocular hemorrhage |
| Disseminated intravascular coagulation          | Non-ocular hemorrhage |
| Duodenal ulcer hemorrhage                       | Non-ocular hemorrhage |
| Diverticulum intestinal hemorrhagic             | Non-ocular hemorrhage |
| Diverticulitis intestinal haemorrhagic          | Non-ocular hemorrhage |
| Duodenitis hemorrhagic                          | Non-ocular hemorrhage |
| Dysfunctional uterine bleeding                  | Non-ocular hemorrhage |
| Ear hemorrhage                                  | Non-ocular hemorrhage |

---

|                                             |                       |
|---------------------------------------------|-----------------------|
| Ecchymosis                                  | Non-ocular hemorrhage |
| Epidural hemorrhage                         | Non-ocular hemorrhage |
| Enterocolitis hemorrhagic                   | Non-ocular hemorrhage |
| Encephalitis hemorrhagic                    | Non-ocular hemorrhage |
| Epistaxis                                   | Non-ocular hemorrhage |
| Exsanguination                              | Non-ocular hemorrhage |
| Extradural hematoma                         | Non-ocular hemorrhage |
| Extravasation blood                         | Non-ocular hemorrhage |
| Femoral artery perforation                  | Non-ocular hemorrhage |
| Femoral vein perforation                    | Non-ocular hemorrhage |
| Fetal-maternal haemorrhage                  | Non-ocular hemorrhage |
| Gastric hemorrhage                          | Non-ocular hemorrhage |
| Gastric ulcer hemorrhage                    | Non-ocular hemorrhage |
| Gastric ulcer hemorrhage, obstructive       | Non-ocular hemorrhage |
| Gastric varices hemorrhage                  | Non-ocular hemorrhage |
| Gastritis alcoholic hemorrhagic             | Non-ocular hemorrhage |
| Gastritis hemorrhagic                       | Non-ocular hemorrhage |
| Gastroduodenal hemorrhage                   | Non-ocular hemorrhage |
| Gastroduodenitis hemorrhagic                | Non-ocular hemorrhage |
| Gastrointestinal angiodysplasia hemorrhagic | Non-ocular hemorrhage |
| Gastrointestinal hemorrhage                 | Non-ocular hemorrhage |
| Genital contusion                           | Non-ocular hemorrhage |
| Gastrointestinal ulcer hemorrhage           | Non-ocular hemorrhage |
| Gastrointestinal polyp hemorrhage           | Non-ocular hemorrhage |
| Genital hemorrhage                          | Non-ocular hemorrhage |
| Hemarthrosis                                | Non-ocular hemorrhage |
| Grey Turner's sign                          | Non-ocular hemorrhage |
| Graft hemorrhage                            | Non-ocular hemorrhage |
| Gingival bleeding                           | Non-ocular hemorrhage |
| Hematoma                                    | Non-ocular hemorrhage |
| Hematocoele                                 | Non-ocular hemorrhage |
| Hematochezia                                | Non-ocular hemorrhage |
| Hematemesis                                 | Non-ocular hemorrhage |
| Hematoma evacuation                         | Non-ocular hemorrhage |
| Hematoma infection                          | Non-ocular hemorrhage |
| Hematosalpinx                               | Non-ocular hemorrhage |
| Hemospermia                                 | Non-ocular hemorrhage |
| Hematotympanum                              | Non-ocular hemorrhage |
| Hematuria                                   | Non-ocular hemorrhage |
| Hematuria traumatic                         | Non-ocular hemorrhage |
| Hemobilia                                   | Non-ocular hemorrhage |
| Hemophilic arthropathy                      | Non-ocular hemorrhage |
| Hemoptysis                                  | Non-ocular hemorrhage |

---

|                                        |                       |
|----------------------------------------|-----------------------|
| Hemorrhage                             | Non-ocular hemorrhage |
| Hemorrhage coronary artery             | Non-ocular hemorrhage |
| Hemorrhage fetal                       | Non-ocular hemorrhage |
| Hemorrhage neonatal                    | Non-ocular hemorrhage |
| Hemorrhage intracranial                | Non-ocular hemorrhage |
| Hemorrhagic anemia                     | Non-ocular hemorrhage |
| Hemorrhage urinary tract               | Non-ocular hemorrhage |
| Hemorrhage subepidermal                | Non-ocular hemorrhage |
| Hemorrhage in pregnancy                | Non-ocular hemorrhage |
| Hemorrhage subcutaneous                | Non-ocular hemorrhage |
| Hemorrhagic arteriovenous malformation | Non-ocular hemorrhage |
| Hemorrhagic ascites                    | Non-ocular hemorrhage |
| Hemorrhagic cerebral infarction        | Non-ocular hemorrhage |
| Hemorrhagic cyst                       | Non-ocular hemorrhage |
| Hemorrhagic diathesis                  | Non-ocular hemorrhage |
| Hemorrhagic disease of newborn         | Non-ocular hemorrhage |
| Hemorrhagic disorder                   | Non-ocular hemorrhage |
| Hemorrhagic erosive gastritis          | Non-ocular hemorrhage |
| Hemorrhagic hepatic cyst               | Non-ocular hemorrhage |
| Hemorrhagic infarction                 | Non-ocular hemorrhage |
| Hemorrhagic necrotic pancreatitis      | Non-ocular hemorrhage |
| Hemorrhagic ovarian cyst               | Non-ocular hemorrhage |
| Hemorrhagic stroke                     | Non-ocular hemorrhage |
| Hemorrhagic thyroid cyst               | Non-ocular hemorrhage |
| Hemorrhagic transformation stroke      | Non-ocular hemorrhage |
| Hemorrhagic tumour necrosis            | Non-ocular hemorrhage |
| Hemorrhagic urticaria                  | Non-ocular hemorrhage |
| Hemorrhagic vasculitis                 | Non-ocular hemorrhage |
| Hemorrhoidal hemorrhage                | Non-ocular hemorrhage |
| Hemostasis                             | Non-ocular hemorrhage |
| Hemothorax                             | Non-ocular hemorrhage |
| Henoch-Schonlein purpura               | Non-ocular hemorrhage |
| Hepatic hemangioma rupture             | Non-ocular hemorrhage |
| Hepatic hematoma                       | Non-ocular hemorrhage |
| Hepatic hemorrhage                     | Non-ocular hemorrhage |
| Hereditary hemorrhagic telangiectasia  | Non-ocular hemorrhage |
| Hyperfibrinolysis                      | Non-ocular hemorrhage |
| Iliac artery perforation               | Non-ocular hemorrhage |
| Iliac artery rupture                   | Non-ocular hemorrhage |
| Iliac vein perforation                 | Non-ocular hemorrhage |
| Immune thrombocytopenic purpura        | Non-ocular hemorrhage |
| Implant site bruising                  | Non-ocular hemorrhage |
| Implant site hematoma                  | Non-ocular hemorrhage |

---

|                                      |                       |
|--------------------------------------|-----------------------|
| Implant site hemorrhage              | Non-ocular hemorrhage |
| Incision site hematoma               | Non-ocular hemorrhage |
| Incision site hemorrhage             | Non-ocular hemorrhage |
| Increased tendency to bruise         | Non-ocular hemorrhage |
| Infusion site bruising               | Non-ocular hemorrhage |
| Inferior vena cava perforation       | Non-ocular hemorrhage |
| Induced abortion hemorrhage          | Non-ocular hemorrhage |
| Internal hemorrhage                  | Non-ocular hemorrhage |
| Instillation site hemorrhage         | Non-ocular hemorrhage |
| Instillation site hematoma           | Non-ocular hemorrhage |
| Infusion site hemorrhage             | Non-ocular hemorrhage |
| Infusion site hematoma               | Non-ocular hemorrhage |
| Intestinal hematoma                  | Non-ocular hemorrhage |
| Intestinal haemorrhage               | Non-ocular hemorrhage |
| Intra-abdominal hematoma             | Non-ocular hemorrhage |
| Intra-abdominal hemorrhage           | Non-ocular hemorrhage |
| Intracerebral hematoma evacuation    | Non-ocular hemorrhage |
| Intracranial hematoma                | Non-ocular hemorrhage |
| Intracranial tumour hemorrhage       | Non-ocular hemorrhage |
| Intrapartum hemorrhage               | Non-ocular hemorrhage |
| Intraventricular hemorrhage          | Non-ocular hemorrhage |
| Intraventricular hemorrhage neonatal | Non-ocular hemorrhage |
| Kidney contusion                     | Non-ocular hemorrhage |
| Large intestinal hemorrhage          | Non-ocular hemorrhage |
| Large intestinal ulcer hemorrhage    | Non-ocular hemorrhage |
| Laryngeal hematoma                   | Non-ocular hemorrhage |
| Laryngeal hemorrhage                 | Non-ocular hemorrhage |
| Lip hematoma                         | Non-ocular hemorrhage |
| Lip hemorrhage                       | Non-ocular hemorrhage |
| Liver contusion                      | Non-ocular hemorrhage |
| Lower gastrointestinal hemorrhage    | Non-ocular hemorrhage |
| Lower limb artery perforation        | Non-ocular hemorrhage |
| Mallory-Weiss syndrome               | Non-ocular hemorrhage |
| Lymph node hemorrhage                | Non-ocular hemorrhage |
| Melena                               | Non-ocular hemorrhage |
| Mediastinal hemorrhage               | Non-ocular hemorrhage |
| Mediastinal hematoma                 | Non-ocular hemorrhage |
| Melena neonatal                      | Non-ocular hemorrhage |
| Meningorrhagia                       | Non-ocular hemorrhage |
| Menometrorrhagia                     | Non-ocular hemorrhage |
| Menorrhagia                          | Non-ocular hemorrhage |
| Mesenteric hematoma                  | Non-ocular hemorrhage |
| Metrorrhagia                         | Non-ocular hemorrhage |
| Mesenteric haemorrhage               | Non-ocular hemorrhage |

---

|                                      |                       |
|--------------------------------------|-----------------------|
| Mouth hemorrhage                     | Non-ocular hemorrhage |
| Mucocutaneous hemorrhage             | Non-ocular hemorrhage |
| Mucosal haemorrhage                  | Non-ocular hemorrhage |
| Muscle contusion                     | Non-ocular hemorrhage |
| Muscle hemorrhage                    | Non-ocular hemorrhage |
| Myocardial hemorrhage                | Non-ocular hemorrhage |
| Myocardial rupture                   | Non-ocular hemorrhage |
| Nevus hemorrhage                     | Non-ocular hemorrhage |
| Nail bed bleeding                    | Non-ocular hemorrhage |
| Nasal septum hematoma                | Non-ocular hemorrhage |
| Neonatal gastrointestinal hemorrhage | Non-ocular hemorrhage |
| Nephritis hemorrhagic                | Non-ocular hemorrhage |
| Nipple exudate bloody                | Non-ocular hemorrhage |
| Esophageal hemorrhage                | Non-ocular hemorrhage |
| Esophagitis hemorrhagic              | Non-ocular hemorrhage |
| Esophageal varices hemorrhage        | Non-ocular hemorrhage |
| Esophageal ulcer hemorrhage          | Non-ocular hemorrhage |
| Oral mucosa hematoma                 | Non-ocular hemorrhage |
| Osteorrhagia                         | Non-ocular hemorrhage |
| Palpable purpura                     | Non-ocular hemorrhage |
| Ovarian hemorrhage                   | Non-ocular hemorrhage |
| Ovarian hematoma                     | Non-ocular hemorrhage |
| Pancreatic hemorrhage                | Non-ocular hemorrhage |
| Pancreatitis hemorrhagic             | Non-ocular hemorrhage |
| Parathyroid hemorrhage               | Non-ocular hemorrhage |
| Paranasal sinus hematoma             | Non-ocular hemorrhage |
| Papillary muscle hemorrhage          | Non-ocular hemorrhage |
| Parotid gland hemorrhage             | Non-ocular hemorrhage |
| Pelvic hematoma                      | Non-ocular hemorrhage |
| Pelvic hematoma obstetric            | Non-ocular hemorrhage |
| Pelvic hemorrhage                    | Non-ocular hemorrhage |
| Penile hemorrhage                    | Non-ocular hemorrhage |
| Penile hematoma                      | Non-ocular hemorrhage |
| Perineal hematoma                    | Non-ocular hemorrhage |
| Pericardial hemorrhage               | Non-ocular hemorrhage |
| Penile contusion                     | Non-ocular hemorrhage |
| Peptic ulcer hemorrhage              | Non-ocular hemorrhage |
| Peripartum hemorrhage                | Non-ocular hemorrhage |
| Perirenal hematoma                   | Non-ocular hemorrhage |
| Peritoneal hemorrhage                | Non-ocular hemorrhage |
| Peritoneal hematoma                  | Non-ocular hemorrhage |
| Periventricular hemorrhage neonatal  | Non-ocular hemorrhage |
| Petechiae                            | Non-ocular hemorrhage |
| Pharyngeal hematoma                  | Non-ocular hemorrhage |



---

|                                       |                       |
|---------------------------------------|-----------------------|
| Pituitary hemorrhage                  | Non-ocular hemorrhage |
| Pharyngeal hemorrhage                 | Non-ocular hemorrhage |
| Placenta praevia hemorrhage           | Non-ocular hemorrhage |
| Polymenorrhagia                       | Non-ocular hemorrhage |
| Post procedural hematuria             | Non-ocular hemorrhage |
| Post procedural hematoma              | Non-ocular hemorrhage |
| Post procedural contusion             | Non-ocular hemorrhage |
| Post abortion hemorrhage              | Non-ocular hemorrhage |
| Post procedural hemorrhage            | Non-ocular hemorrhage |
| Post transfusion purpura              | Non-ocular hemorrhage |
| Postmenopausal hemorrhage             | Non-ocular hemorrhage |
| Postpartum hemorrhage                 | Non-ocular hemorrhage |
| Premature separation of placenta      | Non-ocular hemorrhage |
| Procedural hemorrhage                 | Non-ocular hemorrhage |
| Proctitis hemorrhagic                 | Non-ocular hemorrhage |
| Prostatic hemorrhage                  | Non-ocular hemorrhage |
| Pulmonary alveolar hemorrhage         | Non-ocular hemorrhage |
| Pulmonary hemorrhage                  | Non-ocular hemorrhage |
| Pulmonary hematoma                    | Non-ocular hemorrhage |
| Pulmonary contusion                   | Non-ocular hemorrhage |
| Puncture site hemorrhage              | Non-ocular hemorrhage |
| Purpura                               | Non-ocular hemorrhage |
| Purpura fulminans                     | Non-ocular hemorrhage |
| Purpura neonatal                      | Non-ocular hemorrhage |
| Purpura non-thrombocytopenic          | Non-ocular hemorrhage |
| Purpura senile                        | Non-ocular hemorrhage |
| Putamen hemorrhage                    | Non-ocular hemorrhage |
| Radiation associated hemorrhage       | Non-ocular hemorrhage |
| Rectal hemorrhage                     | Non-ocular hemorrhage |
| Renal hematoma                        | Non-ocular hemorrhage |
| Renal cyst hemorrhage                 | Non-ocular hemorrhage |
| Renal artery perforation              | Non-ocular hemorrhage |
| Scrotal haematocoele                  | Non-ocular hemorrhage |
| Rectal ulcer haemorrhage              | Non-ocular hemorrhage |
| Renal hemorrhage                      | Non-ocular hemorrhage |
| Respiratory tract hemorrhage          | Non-ocular hemorrhage |
| Respiratory tract hemorrhage neonatal | Non-ocular hemorrhage |
| Ruptured cerebral aneurysm            | Non-ocular hemorrhage |
| Retroplacental hematoma               | Non-ocular hemorrhage |
| Retroperitoneal hemorrhage            | Non-ocular hemorrhage |
| Retroperitoneal hematoma              | Non-ocular hemorrhage |
| Skin hemorrhage                       | Non-ocular hemorrhage |
| Shock hemorrhagic                     | Non-ocular hemorrhage |
| Scrotal hematoma                      | Non-ocular hemorrhage |

---

|                                     |                       |
|-------------------------------------|-----------------------|
| Skin neoplasm bleeding              | Non-ocular hemorrhage |
| Skin ulcer hemorrhage               | Non-ocular hemorrhage |
| Small intestinal hemorrhage         | Non-ocular hemorrhage |
| Small intestinal ulcer hemorrhage   | Non-ocular hemorrhage |
| Soft tissue hemorrhage              | Non-ocular hemorrhage |
| Spermatocord hemorrhage             | Non-ocular hemorrhage |
| Spinal epidural hematoma            | Non-ocular hemorrhage |
| Spinal cord hemorrhage              | Non-ocular hemorrhage |
| Spinal cord hematoma                | Non-ocular hemorrhage |
| Spinal epidural hemorrhage          | Non-ocular hemorrhage |
| Spinal subarachnoid hemorrhage      | Non-ocular hemorrhage |
| Spleen contusion                    | Non-ocular hemorrhage |
| Spinal subdural hemorrhage          | Non-ocular hemorrhage |
| Spinal subdural hematoma            | Non-ocular hemorrhage |
| Splenic artery perforation          | Non-ocular hemorrhage |
| Splenic hematoma                    | Non-ocular hemorrhage |
| Splenic hemorrhage                  | Non-ocular hemorrhage |
| Splenic varices hemorrhage          | Non-ocular hemorrhage |
| Splinter hemorrhages                | Non-ocular hemorrhage |
| Stoma site hemorrhage               | Non-ocular hemorrhage |
| Spontaneous hemorrhage              | Non-ocular hemorrhage |
| Spontaneous hematoma                | Non-ocular hemorrhage |
| Subarachnoid hemorrhage             | Non-ocular hemorrhage |
| Subarachnoid hematoma               | Non-ocular hemorrhage |
| Stomatitis hemorrhagic              | Non-ocular hemorrhage |
| Subarachnoid hemorrhage neonatal    | Non-ocular hemorrhage |
| Subdural hematoma                   | Non-ocular hemorrhage |
| Subcutaneous hematoma               | Non-ocular hemorrhage |
| Subclavian vein perforation         | Non-ocular hemorrhage |
| Subclavian artery perforation       | Non-ocular hemorrhage |
| Subchorionic hemorrhage             | Non-ocular hemorrhage |
| Subchorionic hematoma               | Non-ocular hemorrhage |
| Subdural hematoma evacuation        | Non-ocular hemorrhage |
| Subdural hemorrhage                 | Non-ocular hemorrhage |
| Subdural hemorrhage neonatal        | Non-ocular hemorrhage |
| Subgaleal hematoma                  | Non-ocular hemorrhage |
| Superior vena cava perforation      | Non-ocular hemorrhage |
| Testicular hemorrhage               | Non-ocular hemorrhage |
| Thalamus hemorrhage                 | Non-ocular hemorrhage |
| Third stage postpartum hemorrhage   | Non-ocular hemorrhage |
| Thoracic hemorrhage                 | Non-ocular hemorrhage |
| Thrombocytopenic purpura            | Non-ocular hemorrhage |
| Thrombotic thrombocytopenic purpura | Non-ocular hemorrhage |
| Tonsillar hemorrhage                | Non-ocular hemorrhage |

---

|                                   |                       |
|-----------------------------------|-----------------------|
| Tongue hemorrhage                 | Non-ocular hemorrhage |
| Tongue hematoma                   | Non-ocular hemorrhage |
| Tracheal hemorrhage               | Non-ocular hemorrhage |
| Tooth socket hemorrhage           | Non-ocular hemorrhage |
| Thyroid hemorrhage                | Non-ocular hemorrhage |
| Tooth pulp hemorrhage             | Non-ocular hemorrhage |
| Traumatic hemothorax              | Non-ocular hemorrhage |
| Traumatic hemorrhage              | Non-ocular hemorrhage |
| Traumatic hematoma                | Non-ocular hemorrhage |
| Traumatic intracranial hemorrhage | Non-ocular hemorrhage |
| Tumour hemorrhage                 | Non-ocular hemorrhage |
| Ulcer hemorrhage                  | Non-ocular hemorrhage |
| Umbilical cord hemorrhage         | Non-ocular hemorrhage |
| Umbilical hematoma                | Non-ocular hemorrhage |
| Umbilical hemorrhage              | Non-ocular hemorrhage |
| Upper gastrointestinal hemorrhage | Non-ocular hemorrhage |
| Ureteric hemorrhage               | Non-ocular hemorrhage |
| Urethral hemorrhage               | Non-ocular hemorrhage |
| Urinary bladder hemorrhage        | Non-ocular hemorrhage |
| Urogenital hemorrhage             | Non-ocular hemorrhage |
| Uterine hematoma                  | Non-ocular hemorrhage |
| Uterine hemorrhage                | Non-ocular hemorrhage |
| Vaccination site bruising         | Non-ocular hemorrhage |
| Vaginal hematoma                  | Non-ocular hemorrhage |
| Vaccination site hemorrhage       | Non-ocular hemorrhage |
| Vaccination site hematoma         | Non-ocular hemorrhage |
| Vaginal hemorrhage                | Non-ocular hemorrhage |
| Varicose vein ruptured            | Non-ocular hemorrhage |
| Vascular pseudoaneurysm ruptured  | Non-ocular hemorrhage |
| Vascular purpura                  | Non-ocular hemorrhage |
| Vein rupture                      | Non-ocular hemorrhage |
| Vascular rupture                  | Non-ocular hemorrhage |
| Venous hemorrhage                 | Non-ocular hemorrhage |
| Venous perforation                | Non-ocular hemorrhage |
| Ventricle rupture                 | Non-ocular hemorrhage |
| Vertebral artery perforation      | Non-ocular hemorrhage |
| Vessel puncture site bruise       | Non-ocular hemorrhage |
| Vessel puncture site hemorrhage   | Non-ocular hemorrhage |
| Vulval hematoma                   | Non-ocular hemorrhage |
| Vessel puncture site hematoma     | Non-ocular hemorrhage |
| Vulval hematoma evacuation        | Non-ocular hemorrhage |
| Vulval hemorrhage                 | Non-ocular hemorrhage |
| Wound hemorrhage                  | Non-ocular hemorrhage |
| Wound hematoma                    | Non-ocular hemorrhage |



---

|                                                    |                                               |
|----------------------------------------------------|-----------------------------------------------|
| Capsular warning syndrome                          | Non-myocardial arterial thromboembolic events |
| Carotid artery bypass                              | Non-myocardial arterial thromboembolic events |
| Carotid arteriosclerosis                           | Non-myocardial arterial thromboembolic events |
| Carotid artery stenosis                            | Non-myocardial arterial thromboembolic events |
| Carotid arterial embolus                           | Non-myocardial arterial thromboembolic events |
| Carotid artery disease                             | Non-myocardial arterial thromboembolic events |
| Carotid artery insufficiency                       | Non-myocardial arterial thromboembolic events |
| Carotid artery restenosis                          | Non-myocardial arterial thromboembolic events |
| Carotid artery perforation                         | Non-myocardial arterial thromboembolic events |
| Carotid artery occlusion                           | Non-myocardial arterial thromboembolic events |
| Carotid artery stent insertion                     | Non-myocardial arterial thromboembolic events |
| Carotid artery thrombosis                          | Non-myocardial arterial thromboembolic events |
| Carotid artery stent removal                       | Non-myocardial arterial thromboembolic events |
| Carotid endarterectomy                             | Non-myocardial arterial thromboembolic events |
| Carotid revascularization                          | Non-myocardial arterial thromboembolic events |
| Central nervous system hemorrhage                  | Non-myocardial arterial thromboembolic events |
| Cerebellar embolism                                | Non-myocardial arterial thromboembolic events |
| Cerebellar artery thrombosis                       | Non-myocardial arterial thromboembolic events |
| Cerebellar artery occlusion                        | Non-myocardial arterial thromboembolic events |
| Cerebellar hematoma                                | Non-myocardial arterial thromboembolic events |
| Cerebellar hemorrhage                              | Non-myocardial arterial thromboembolic events |
| Cerebellar infarction                              | Non-myocardial arterial thromboembolic events |
| Cerebellar ischemia                                | Non-myocardial arterial thromboembolic events |
| Cerebellar microhemorrhage                         | Non-myocardial arterial thromboembolic events |
| Cerebral aneurysm perforation                      | Non-myocardial arterial thromboembolic events |
| Cerebral aneurysm ruptured syphilitic              | Non-myocardial arterial thromboembolic events |
| Cerebral arteriosclerosis                          | Non-myocardial arterial thromboembolic events |
| Cerebral arteriovenous malformation<br>hemorrhagic | Non-myocardial arterial thromboembolic events |
| Cerebral artery stenosis                           | Non-myocardial arterial thromboembolic events |
| Cerebral artery restenosis                         | Non-myocardial arterial thromboembolic events |
| Cerebral artery perforation                        | Non-myocardial arterial thromboembolic events |
| Cerebral artery occlusion                          | Non-myocardial arterial thromboembolic events |
| Cerebral artery embolism                           | Non-myocardial arterial thromboembolic events |
| Cerebral artery thrombosis                         | Non-myocardial arterial thromboembolic events |
| Cerebral gas embolism                              | Non-myocardial arterial thromboembolic events |
| Cerebral hematoma                                  | Non-myocardial arterial thromboembolic events |
| Cerebral hemorrhage                                | Non-myocardial arterial thromboembolic events |
| Cerebral hemorrhage foetal                         | Non-myocardial arterial thromboembolic events |
| Cerebral hemorrhage neonatal                       | Non-myocardial arterial thromboembolic events |
| Cerebral hypoperfusion                             | Non-myocardial arterial thromboembolic events |
| Cerebral infarction                                | Non-myocardial arterial thromboembolic events |
| Cerebral infarction fetal                          | Non-myocardial arterial thromboembolic events |
| Cerebral ischemia                                  | Non-myocardial arterial thromboembolic events |

---

|                                          |                                               |
|------------------------------------------|-----------------------------------------------|
| Cerebral septic infarct                  | Non-myocardial arterial thromboembolic events |
| Cerebral revascularization               | Non-myocardial arterial thromboembolic events |
| Cerebral microhemorrhage                 | Non-myocardial arterial thromboembolic events |
| Cerebral small vessel ischemic disease   | Non-myocardial arterial thromboembolic events |
| Cerebral thrombosis                      | Non-myocardial arterial thromboembolic events |
| Cerebral vasoconstriction                | Non-myocardial arterial thromboembolic events |
| Cerebral venous thrombosis               | Non-myocardial arterial thromboembolic events |
| Cerebrovascular accident                 | Non-myocardial arterial thromboembolic events |
| Cerebrovascular disorder                 | Non-myocardial arterial thromboembolic events |
| Cerebrovascular insufficiency            | Non-myocardial arterial thromboembolic events |
| Cerebrovascular stenosis                 | Non-myocardial arterial thromboembolic events |
| Coeliac artery occlusion                 | Non-myocardial arterial thromboembolic events |
| Embolia cutis medicamentosa              | Non-myocardial arterial thromboembolic events |
| Embolic cerebral infarction              | Non-myocardial arterial thromboembolic events |
| Embolic stroke                           | Non-myocardial arterial thromboembolic events |
| Embolism                                 | Non-myocardial arterial thromboembolic events |
| Embolism arterial                        | Non-myocardial arterial thromboembolic events |
| Endarterectomy                           | Non-myocardial arterial thromboembolic events |
| Femoral artery occlusion                 | Non-myocardial arterial thromboembolic events |
| Femoral artery embolism                  | Non-myocardial arterial thromboembolic events |
| Extradural hematoma                      | Non-myocardial arterial thromboembolic events |
| Epidural hemorrhage                      | Non-myocardial arterial thromboembolic events |
| Hemorrhage intracranial                  | Non-myocardial arterial thromboembolic events |
| Hemorrhagic cerebral infarction          | Non-myocardial arterial thromboembolic events |
| Hemorrhagic stroke                       | Non-myocardial arterial thromboembolic events |
| Hemorrhagic transformation stroke        | Non-myocardial arterial thromboembolic events |
| Hepatic artery thrombosis                | Non-myocardial arterial thromboembolic events |
| Hepatic artery occlusion                 | Non-myocardial arterial thromboembolic events |
| Hepatic artery embolism                  | Non-myocardial arterial thromboembolic events |
| Hypthenar hammer syndrome                | Non-myocardial arterial thromboembolic events |
| Hypoxic-ischemic encephalopathy          | Non-myocardial arterial thromboembolic events |
| Inner ear infarction                     | Non-myocardial arterial thromboembolic events |
| Iliac artery occlusion                   | Non-myocardial arterial thromboembolic events |
| Iliac artery embolism                    | Non-myocardial arterial thromboembolic events |
| Intra-aortic balloon placement           | Non-myocardial arterial thromboembolic events |
| Intracerebral hematoma evacuation        | Non-myocardial arterial thromboembolic events |
| Intracranial hematoma                    | Non-myocardial arterial thromboembolic events |
| Intracranial tumour hemorrhage           | Non-myocardial arterial thromboembolic events |
| Intraoperative cerebral artery occlusion | Non-myocardial arterial thromboembolic events |
| Intraventricular hemorrhage              | Non-myocardial arterial thromboembolic events |
| Intraventricular hemorrhage neonatal     | Non-myocardial arterial thromboembolic events |
| Ischemic cerebral infarction             | Non-myocardial arterial thromboembolic events |
| Lacunar stroke                           | Non-myocardial arterial thromboembolic events |

---

|                                               |                                               |
|-----------------------------------------------|-----------------------------------------------|
| Lacunar infarction                            | Non-myocardial arterial thromboembolic events |
| Ischemic stroke                               | Non-myocardial arterial thromboembolic events |
| Lateral medullary syndrome                    | Non-myocardial arterial thromboembolic events |
| Left atrial appendage occlusion               | Non-myocardial arterial thromboembolic events |
| Leriche syndrome                              | Non-myocardial arterial thromboembolic events |
| Meningorrhagia                                | Non-myocardial arterial thromboembolic events |
| Mesenteric artery stenosis                    | Non-myocardial arterial thromboembolic events |
| Mesenteric artery embolism                    | Non-myocardial arterial thromboembolic events |
| Mesenteric arteriosclerosis                   | Non-myocardial arterial thromboembolic events |
| Mesenteric arterial occlusion                 | Non-myocardial arterial thromboembolic events |
| Mesenteric artery stent insertion             | Non-myocardial arterial thromboembolic events |
| Mesenteric artery thrombosis                  | Non-myocardial arterial thromboembolic events |
| Microembolism                                 | Non-myocardial arterial thromboembolic events |
| Migrainous infarction                         | Non-myocardial arterial thromboembolic events |
| Millard-Gubler syndrome                       | Non-myocardial arterial thromboembolic events |
| Moyamoya disease                              | Non-myocardial arterial thromboembolic events |
| Penile artery occlusion                       | Non-myocardial arterial thromboembolic events |
| Percutaneous coronary intervention            | Non-myocardial arterial thromboembolic events |
| Perinatal stroke                              | Non-myocardial arterial thromboembolic events |
| Peripheral arterial occlusive disease         | Non-myocardial arterial thromboembolic events |
| Peripheral artery bypass                      | Non-myocardial arterial thromboembolic events |
| Peripheral artery angioplasty                 | Non-myocardial arterial thromboembolic events |
| Peripheral arterial reocclusion               | Non-myocardial arterial thromboembolic events |
| Peripheral artery stent insertion             | Non-myocardial arterial thromboembolic events |
| Peripheral artery thrombosis                  | Non-myocardial arterial thromboembolic events |
| Peripheral embolism                           | Non-myocardial arterial thromboembolic events |
| Peripheral endarterectomy                     | Non-myocardial arterial thromboembolic events |
| Periventricular hemorrhage neonatal           | Non-myocardial arterial thromboembolic events |
| Pituitary hemorrhage                          | Non-myocardial arterial thromboembolic events |
| Popliteal artery entrapment syndrome          | Non-myocardial arterial thromboembolic events |
| Post procedural stroke                        | Non-myocardial arterial thromboembolic events |
| Precerebral artery occlusion                  | Non-myocardial arterial thromboembolic events |
| Precerebral artery thrombosis                 | Non-myocardial arterial thromboembolic events |
| Pulmonary artery therapeutic procedure        | Non-myocardial arterial thromboembolic events |
| Putamen hemorrhage                            | Non-myocardial arterial thromboembolic events |
| Pulmonary endarterectomy                      | Non-myocardial arterial thromboembolic events |
| Pulmonary artery thrombosis                   | Non-myocardial arterial thromboembolic events |
| Renal artery occlusion                        | Non-myocardial arterial thromboembolic events |
| Renal artery thrombosis                       | Non-myocardial arterial thromboembolic events |
| Renal embolism                                | Non-myocardial arterial thromboembolic events |
| Renal artery angioplasty                      | Non-myocardial arterial thromboembolic events |
| Reversible cerebral vasoconstriction syndrome | Non-myocardial arterial thromboembolic events |

---

|                                          |                                               |
|------------------------------------------|-----------------------------------------------|
| Reversible ischemic neurological deficit | Non-myocardial arterial thromboembolic events |
| Ruptured cerebral aneurysm               | Non-myocardial arterial thromboembolic events |
| Spinal cord hemorrhage                   | Non-myocardial arterial thromboembolic events |
| Spinal cord hematoma                     | Non-myocardial arterial thromboembolic events |
| Spinal artery thrombosis                 | Non-myocardial arterial thromboembolic events |
| Spinal artery embolism                   | Non-myocardial arterial thromboembolic events |
| Spinal epidural hematoma                 | Non-myocardial arterial thromboembolic events |
| Spinal epidural hemorrhage               | Non-myocardial arterial thromboembolic events |
| Spinal subarachnoid hemorrhage           | Non-myocardial arterial thromboembolic events |
| Splenic artery thrombosis                | Non-myocardial arterial thromboembolic events |
| Spinal subdural hemorrhage               | Non-myocardial arterial thromboembolic events |
| Spinal subdural hematoma                 | Non-myocardial arterial thromboembolic events |
| Splenic embolism                         | Non-myocardial arterial thromboembolic events |
| Stress cardiomyopathy                    | Non-myocardial arterial thromboembolic events |
| Stroke in evolution                      | Non-myocardial arterial thromboembolic events |
| Subarachnoid hematoma                    | Non-myocardial arterial thromboembolic events |
| Subarachnoid hemorrhage                  | Non-myocardial arterial thromboembolic events |
| Subarachnoid hemorrhage neonatal         | Non-myocardial arterial thromboembolic events |
| Subdural hematoma                        | Non-myocardial arterial thromboembolic events |
| Subclavian steal syndrome                | Non-myocardial arterial thromboembolic events |
| Subclavian artery thrombosis             | Non-myocardial arterial thromboembolic events |
| Subclavian artery occlusion              | Non-myocardial arterial thromboembolic events |
| Subclavian artery embolism               | Non-myocardial arterial thromboembolic events |
| Subdural hematoma evacuation             | Non-myocardial arterial thromboembolic events |
| Subdural hemorrhage                      | Non-myocardial arterial thromboembolic events |
| Subdural hemorrhage neonatal             | Non-myocardial arterial thromboembolic events |
| Superior mesenteric artery syndrome      | Non-myocardial arterial thromboembolic events |
| Thalamic infarction                      | Non-myocardial arterial thromboembolic events |
| Thalamus hemorrhage                      | Non-myocardial arterial thromboembolic events |
| Thromboembolism                          | Non-myocardial arterial thromboembolic events |
| Thrombotic stroke                        | Non-myocardial arterial thromboembolic events |
| Thrombotic microangiopathy               | Non-myocardial arterial thromboembolic events |
| Thrombotic cerebral infarction           | Non-myocardial arterial thromboembolic events |
| Thrombotic thrombocytopenic purpura      | Non-myocardial arterial thromboembolic events |
| Transient ischemic attack                | Non-myocardial arterial thromboembolic events |
| Truncus coeliacus thrombosis             | Non-myocardial arterial thromboembolic events |
| Vertebral artery occlusion               | Non-myocardial arterial thromboembolic events |
| Vascular stent stenosis                  | Non-myocardial arterial thromboembolic events |
| Vascular stent restenosis                | Non-myocardial arterial thromboembolic events |
| Vascular stent occlusion                 | Non-myocardial arterial thromboembolic events |
| Vascular encephalopathy                  | Non-myocardial arterial thromboembolic events |
| Vertebral artery perforation             | Non-myocardial arterial thromboembolic events |
| Vertebral artery stenosis                | Non-myocardial arterial thromboembolic events |



|                                      |                                               |
|--------------------------------------|-----------------------------------------------|
| Vertebral artery thrombosis          | Non-myocardial arterial thromboembolic events |
| Vertebrobasilar insufficiency        | Non-myocardial arterial thromboembolic events |
| Visual acuity reduced transiently    | Non-myocardial arterial thromboembolic events |
| Axillary vein thrombosis             | Venous thromboembolic events                  |
| Cerebral venous thrombosis           | Venous thromboembolic events                  |
| Budd-Chiari syndrome                 | Venous thromboembolic events                  |
| Catheterisation venous               | Venous thromboembolic events                  |
| Central venous catheterization       | Venous thromboembolic events                  |
| Cavernous sinus thrombosis           | Venous thromboembolic events                  |
| Compression stockings application    | Venous thromboembolic events                  |
| Deep vein thrombosis                 | Venous thromboembolic events                  |
| Deep vein thrombosis postoperative   | Venous thromboembolic events                  |
| Embolism                             | Venous thromboembolic events                  |
| Embolism venous                      | Venous thromboembolic events                  |
| Iliac vein occlusion                 | Venous thromboembolic events                  |
| Homans' sign positive                | Venous thromboembolic events                  |
| Hepatic vein thrombosis              | Venous thromboembolic events                  |
| Hepatic vein occlusion               | Venous thromboembolic events                  |
| Inferior vena cava syndrome          | Venous thromboembolic events                  |
| Inferior vena caval occlusion        | Venous thromboembolic events                  |
| Intracranial venous sinus thrombosis | Venous thromboembolic events                  |
| Jugular vein thrombosis              | Venous thromboembolic events                  |
| Mahler sign                          | Venous thromboembolic events                  |
| May-Thurner syndrome                 | Venous thromboembolic events                  |
| Mesenteric vein thrombosis           | Venous thromboembolic events                  |
| Mesenteric venous occlusion          | Venous thromboembolic events                  |
| Obstetrical pulmonary embolism       | Venous thromboembolic events                  |
| Obstructive shock                    | Venous thromboembolic events                  |
| Ovarian vein thrombosis              | Venous thromboembolic events                  |
| Penile vein thrombosis               | Venous thromboembolic events                  |
| Pelvic venous thrombosis             | Venous thromboembolic events                  |
| Paget-Schroetter syndrome            | Venous thromboembolic events                  |
| Phlebectomy                          | Venous thromboembolic events                  |
| Portal vein cavernous transformation | Venous thromboembolic events                  |
| Portal vein occlusion                | Venous thromboembolic events                  |
| Portal vein thrombosis               | Venous thromboembolic events                  |
| Post procedural pulmonary embolism   | Venous thromboembolic events                  |
| Post thrombotic syndrome             | Venous thromboembolic events                  |
| Postoperative thrombosis             | Venous thromboembolic events                  |
| Postpartum venous thrombosis         | Venous thromboembolic events                  |
| Pulmonary embolism                   | Venous thromboembolic events                  |
| Pulmonary infarction                 | Venous thromboembolic events                  |
| Pulmonary microemboli                | Venous thromboembolic events                  |
| Pulmonary thrombosis                 | Venous thromboembolic events                  |

---

|                                    |                              |
|------------------------------------|------------------------------|
| Pulmonary vein occlusion           | Venous thromboembolic events |
| Pulmonary veno-occlusive disease   | Venous thromboembolic events |
| Pulmonary venous thrombosis        | Venous thromboembolic events |
| Renal vein thrombosis              | Venous thromboembolic events |
| SI QIII TIII pattern               | Venous thromboembolic events |
| Renal vein occlusion               | Venous thromboembolic events |
| Renal vein embolism                | Venous thromboembolic events |
| Splenic vein occlusion             | Venous thromboembolic events |
| Splenic vein thrombosis            | Venous thromboembolic events |
| Subclavian vein thrombosis         | Venous thromboembolic events |
| Superior sagittal sinus thrombosis | Venous thromboembolic events |
| Thrombophlebitis                   | Venous thromboembolic events |
| Superior vena cava syndrome        | Venous thromboembolic events |
| Superior vena cava occlusion       | Venous thromboembolic events |
| Thrombophlebitis migrans           | Venous thromboembolic events |
| Thrombophlebitis superficial       | Venous thromboembolic events |
| Thrombosed varicose vein           | Venous thromboembolic events |
| Thrombophlebitis neonatal          | Venous thromboembolic events |
| Thrombosis corpora cavernosa       | Venous thromboembolic events |
| Transverse sinus thrombosis        | Venous thromboembolic events |
| Vascular graft                     | Venous thromboembolic events |
| Vena cava embolism                 | Venous thromboembolic events |
| Venogram abnormal                  | Venous thromboembolic events |
| Vena cava thrombosis               | Venous thromboembolic events |
| Vena cava filter removal           | Venous thromboembolic events |
| Vena cava filter insertion         | Venous thromboembolic events |
| Venoocclusive disease              | Venous thromboembolic events |
| Venoocclusive liver disease        | Venous thromboembolic events |
| Venous occlusion                   | Venous thromboembolic events |
| Venous operation                   | Venous thromboembolic events |
| Venous recanalisation              | Venous thromboembolic events |
| Venous repair                      | Venous thromboembolic events |
| Venous stent insertion             | Venous thromboembolic events |
| Venous thrombosis                  | Venous thromboembolic events |
| Venous thrombosis in pregnancy     | Venous thromboembolic events |
| Venous thrombosis limb             | Venous thromboembolic events |
| Venous thrombosis neonatal         | Venous thromboembolic events |
| Angle closure glaucoma             | Glaucoma                     |
| Borderline glaucoma                | Glaucoma                     |
| Developmental glaucoma             | Glaucoma                     |
| Diabetic glaucoma                  | Glaucoma                     |
| Exfoliation glaucoma               | Glaucoma                     |
| Fundoscopy abnormal                | Glaucoma                     |
| Glaucoma                           | Glaucoma                     |

---

|                                                             |                                                    |
|-------------------------------------------------------------|----------------------------------------------------|
| Glaucoma drug therapy                                       | Glaucoma                                           |
| Glaucoma surgery                                            | Glaucoma                                           |
| Glaucoma traumatic                                          | Glaucoma                                           |
| Glaucomatocyclitic crises                                   | Glaucoma                                           |
| Glaucomatous optic disc atrophy                             | Glaucoma                                           |
| Gonioscopy abnormal                                         | Glaucoma                                           |
| Halo vision                                                 | Glaucoma                                           |
| Iridotomy                                                   | Glaucoma                                           |
| Loss of visual contrast sensitivity                         | Glaucoma                                           |
| Normal tension glaucoma                                     | Glaucoma                                           |
| Open angle glaucoma                                         | Glaucoma                                           |
| Ophthalmic fluid drainage                                   | Glaucoma                                           |
| Optic discs blurred                                         | Glaucoma                                           |
| Optic nerve cup/disc ratio increased                        | Glaucoma                                           |
| Pigmentary glaucoma                                         | Glaucoma                                           |
| Phacotrabeculectomy                                         | Glaucoma                                           |
| Phacolytic glaucoma                                         | Glaucoma                                           |
| Optic nerve cupping                                         | Glaucoma                                           |
| Pupillary light reflex tests abnormal                       | Glaucoma                                           |
| Slit-lamp tests abnormal                                    | Glaucoma                                           |
| Uveitic glaucoma                                            | Glaucoma                                           |
| Trabeculoplasty                                             | Glaucoma                                           |
| Trabeculectomy                                              | Glaucoma                                           |
| Uveitisglaucoma-hyphaema syndrome                           | Glaucoma                                           |
| Visual fieldtests abnormal                                  | Glaucoma                                           |
| Accidental overdose                                         | Overdose due to overfill of the pre-filled syringe |
| Chemical poisoning                                          | Overdose due to overfill of the pre-filled syringe |
| Accidental poisoning                                        | Overdose due to overfill of the pre-filled syringe |
| Intentional overdose                                        | Overdose due to overfill of the pre-filled syringe |
| Exposure to toxic agent                                     | Overdose due to overfill of the pre-filled syringe |
| Toxicity to various agents                                  | Overdose due to overfill of the pre-filled syringe |
| Prescribed overdose                                         | Overdose due to overfill of the pre-filled syringe |
| Poisoning deliberate                                        | Overdose due to overfill of the pre-filled syringe |
| Overdose Poisoning                                          | Overdose due to overfill of the pre-filled syringe |
| OR checkbox 'Overdose' ticked for PFS drug preparation only | Overdose due to overfill of the pre-filled syringe |

---

MedDRA, Medical Dictionary for Drug Regulatory Activities; PFS, pre-filled syringe, RMP, Risk Management Plan
